# Supplementary material for: Comparison of Intra-operative Analgesia and Peri-Operative Behaviour and Gastrointestinal Motility in Rabbits Receiving a Brachial Plexus Block or Lidocaine Constant Rate Infusion for Orthopaedic Surgery
Source: Preprints.org preprint supplement (doi:10.20944/preprints202403.0234.v1), 2024-03-05
Supplement: Supplementary file 1 [file supplementary]

**S1.** Post hoc video processing using Python script designed to detect whole rabbit movement and track distance travelled during the first two hours after recovery. Written using Python Software Foundation, version 3.10.5

```
import csv
import cv2
import logging
import math

video_file_name = "Video_file_name.avi"

# Create a VideoCapture object and read from input file
cap = cv2.VideoCapture(video_file_name)
fps = cap.get(cv2.CAP_PROP_FPS)
frame_count = 0

# Create object detector
object_detector = cv2.createBackgroundSubtractorMOG2(
    history=300,
    varThreshold=30
)

# Setup logging
logging.basicConfig(
    filename=f"{video_file_name}.log",
    encoding="utf-8",
    level=logging.INFO,
    filemode='w'
)
logging.info('Starting script')

# Setup CSV for time/"distance" logging
csv_file = open(
    f'{video_file_name}.csv', 'w',
    encoding='UTF8',
    newline=''
)
csv_writer = csv.writer(csv_file)
csv_writer.writerow(['timestamp', 'cumulative_distance_travelled'])

# Check if video file has opened successfully
if cap.isOpened() is False:
    logging.error('Error opening video file')

previous_detection = None
cumulative_distance_travelled = 0
consecutive_frames_failed_to_read = 0
while cap.isOpened():
    frame_count += 1
```

```

# Capture frame-by-frame
frame_exists, current_frame = cap.read()

# Get timestamp of frame in seconds
frame_timestamp = frame_count / fps

logging.info(
    f'Frame: {frame_count}. '
    f'Timestamp: "{:.6f}".format(frame_count / fps)}. '
    f'Exists: {frame_exists}.'
)

if frame_exists is True:
    consecutive_frames_failed_to_read = 0
    height, width, _ = current_frame.shape

    # Extract ROI
    roi = current_frame[0: 720, 0: 576]

    # Object detection
    mask = object_detector.apply(roi)
    _, mask = cv2.threshold(mask, 254, 255, cv2.THRESH_BINARY)
    contours, _ = cv2.findContours(
        mask,
        cv2.RETR_TREE,
        cv2.CHAIN_APPROX_SIMPLE
    )

    # Only storing largest detection (if there is one)
    detection = None
    largest_detected_area = 0
    for cnt in contours:
        # Calculate area and remove small elements
        area = cv2.contourArea(cnt)
        if area > 100 and area > largest_detected_area:
            # cv2.drawContours(roi, [cnt], -1, (0, 255, 0), 2)
            x, y, w, h = cv2.boundingRect(cnt)
            cv2.rectangle(roi, (x, y), (x + w, y + h), (0, 255, 0), 3)

            detection = (x, y, w, h)
            largest_detected_area = area

    if detection:
        logging.info(f' Detection (x): {detection[0]}.')
        logging.info(f' Detection (y): {detection[1]}.')
        logging.info(f' Detection (w): {detection[2]}.')
        logging.info(f' Detection (h): {detection[3]}.')

```

```

# Calculate distance moved from last detection
if previous_detection:
    (
        previous_x,
        previous_y,
        previous_w,
        previous_h
    ) = previous_detection
    previous_center_point = (
        previous_x + previous_w / 2,
        previous_y + previous_h / 2
    )

    (current_x, current_y, current_w, current_h) = detection
    current_center_point = (
        current_x + current_w / 2,
        current_y + current_h / 2
    )

    x_difference = abs(
        current_center_point[0] - previous_center_point[0]
    )
    y_difference = abs(
        current_center_point[1] - previous_center_point[1]
    )
    distance_travelled = math.sqrt(
        x_difference ** 2 + y_difference ** 2
    )
    cumulative_distance_travelled += distance_travelled

    previous_detection = detection

# Display ROI, frame and mask
cv2.imshow("ROI", roi)
cv2.imshow("Frame", current_frame)
cv2.imshow("Mask", mask)
cv2.waitKey(10)
else:
    # Failed to read frame
    consecutive_frames_failed_to_read += 1
    if consecutive_frames_failed_to_read >= 30:
        logging.error(
            'Encountered 30 frames in a row that were unreadable, exiting'
        )
        break

# Always write frame to CSV

```

```
        csv_writer.writerow([
            "{:.6f}".format(frame_count / fps),
            "{:.6f}".format(cumulative_distance_travelled)
        ])

# When everything done, release the video capture object
cap.release()

# Closes all the frames
cv2.destroyAllWindows()

# Close CSV file
csv_file.close()

logging.info('End of script')
```
